# Supplementary material for: Polynuclear complexes of macrocyclic oxamide with 5-sulfosalicylate: syntheses, crystal structures and magnetic properties
Source: Royal Society of Chemistry journal article supplement (doi:10.1039/c0dt00082e), 2010-01-01
Supplement: c0dt00082e.pdf [file c0dt00082e.pdf]

## Polynuclear Complexes of Macrocyclic Oxamide with Co-ligands: Syntheses, Crystal Structures and Magnetic Properties

Ya-Qiu Sun, Lan-Lan Fan, Dong-Zhao Gao, Qing-Lun Wang, Miao Du,  
Dai-Zheng Liao, Chen-Xi Zhang

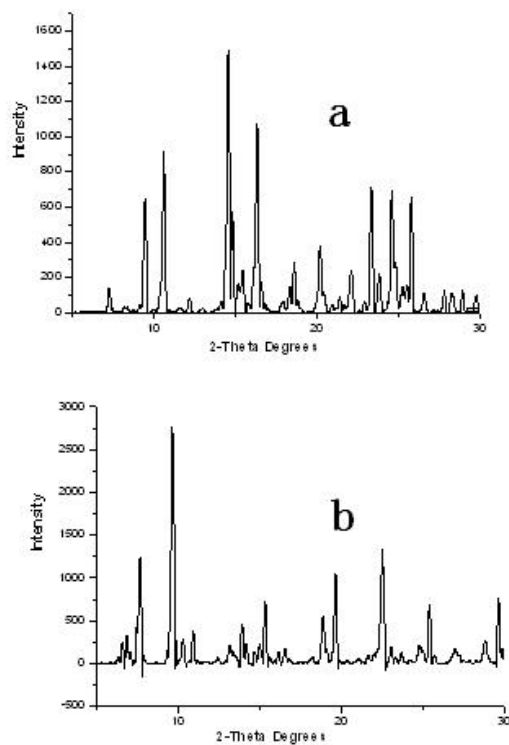

Fig.1 XRPD spectra of the title complex 1 (a) and complex 3 (b)

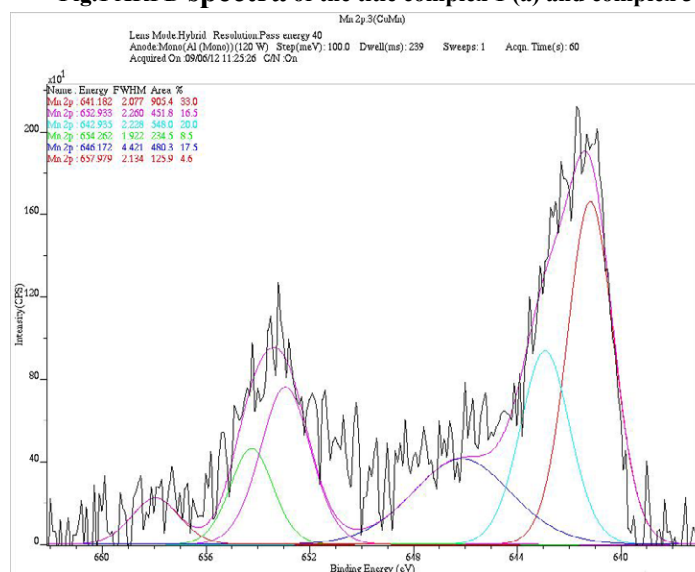

Fig.2 XPS spectrum of the title complex 1

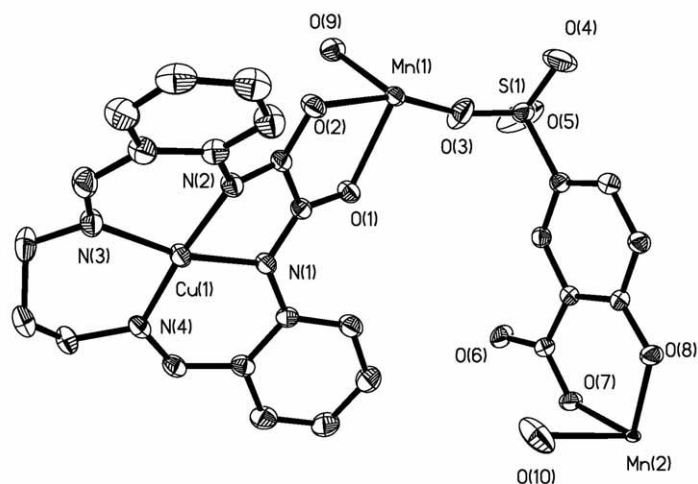

Fig. 3 ORTEP drawing of the complex 1(displacement ellipsoids are drawn at the 30% probability level)

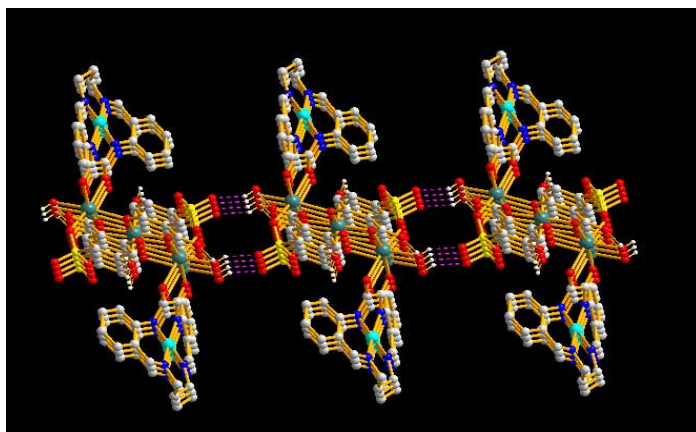

Fig.4 View of the self-assembly 2D porous supermolecular architecture through hydrogen bonding interactions for the complex 1

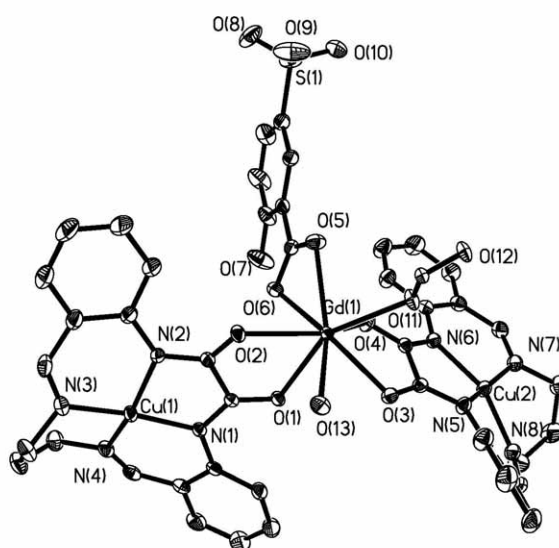

Fig. 5 ORTEP drawing of the complex 2(displacement ellipsoids are drawn at the 30% probability level)

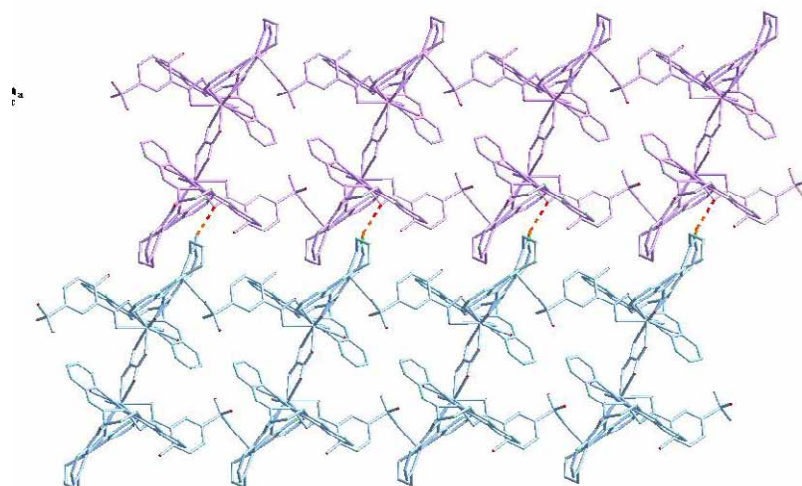

Fig.6 View of the self-assembly 2-D supermolecular architecture through hydrogen bonding interactions for the complex 2.

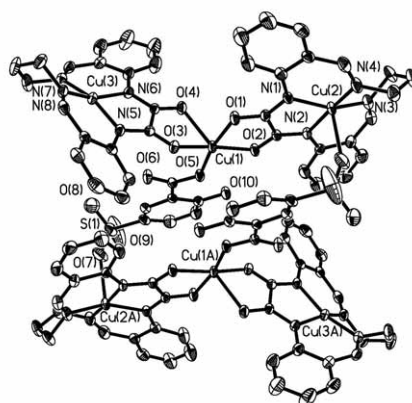

Fig. 7 ORTEP drawing of the complex 2 (displacement ellipsoids are drawn at the 30% probability level)

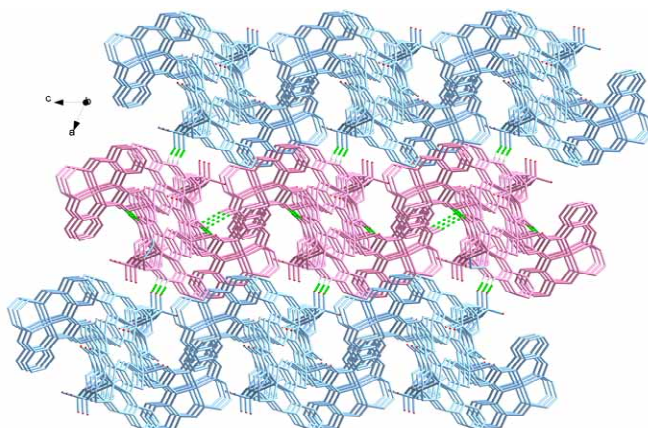

**Fig. 8 View of the self-assembly 3-D supermolecular architecture through hydrogen bonding and  $\pi$ - $\pi$  interactions for the complex 3.**

Bond valence sum calculations of manganese atoms in complex1 is following:

The oxidation state  $Z_j = \sum_j S_{ij}$

The valences of the individual bonds  $S_{ij}$ ,  $S_{ij} = \exp[(R_o - R_{ij})/b]$

Table 1. Summary of distances and valences of the individual bonds

| atom | Mni-Oj    | distances Å | $S_{ij}$ | Oxidation state $Z_j$ |
|------|-----------|-------------|----------|-----------------------|
| Mn1  | Mn1-O3    | 2.087(4)    | 0.448    | 2.068                 |
|      | Mn1-O9    | 2.169(3)    | 0.359    |                       |
|      | Mn1-O8#1  | 2.197(3)    | 0.333    |                       |
|      | Mn1-O2    | 2.201(3)    | 0.329    |                       |
|      | Mn1-O1    | 2.218(3)    | 0.315    |                       |
|      | Mn1-O7#2  | 2.256(3)    | 0.284    |                       |
| Mn2  | Mn2-O8#1  | 1.901(3)    | 0.741    | 3.304                 |
|      | Mn2-O8#2  | 1.901(3)    | 0.741    |                       |
|      | Mn2-O7#1  | 1.920(3)    | 0.704    |                       |
|      | Mn2-O7#2  | 1.920(3)    | 0.704    |                       |
|      | Mn2-O10   | 2.372(8)    | 0.207    |                       |
|      | Mn2-O10#3 | 2.372(8)    | 0.207    |                       |

$R_o = 1.79$  for Mn-O; Symmetry transformations used to generate equivalent atoms: for 1, #1 -x+1,-y+2,-z; #2 x-1,y,z; #3 -x,-y+2,-z

$$\chi_{Mn_3} = \frac{N\beta^2 g^2}{kT} \cdot \frac{A}{B} \quad (1)$$

$$A = 280 + 182 \exp(-14J/kT) + 270 \exp(-26J/kT) + 28 \exp(-44J/kT) + 182 \exp(-4J/kT)$$

$$+ 138 \exp(-16J/kT) + 28 \exp(-34J/kT) + 10 \exp(-40J/kT) + 132 \exp(2J/kT) + 120 \exp(-18J/kT)$$

$$+ 10 \exp(-32J/kT) + 2 \exp(-36J/kT) + 38 \exp(-20J/kT) + 2 \exp(-30J/kT) + 10 \exp(-22J/kT)$$

$$B = 15 + 13 \exp(-14J/kT) + 44 \exp(-26J/kT) + 7 \exp(-44J/kT) + 13 \exp(-4J/kT) + 18 \exp(-16J/kT)$$

$$+ 7 \exp(-34J/kT) + 5 \exp(-40J/kT) + 11 \exp(-2J/kT) + 3 \exp(-30J/kT) + 18 \exp(-18J/kT)$$

$$+ 6 \exp(-32J/kT) + 3 \exp(-36J/kT) + 12 \exp(-20J/kT) + 5 \exp(-22J/kT)$$

$$\chi_M = 2\chi_{Cu} + \chi_{Mn_3} \quad (2)$$
